# Supplementary material
Source: ML conference proceedings conference paper supplement (https://aclanthology.org/2022.findings-emnlp.208)
Supplement: note [file 2022.findings-emnlp.208.note.pdf]

To the EMNLP Program Chairs:

We are uploading the final version of our manuscript for paper #1810, entitled “Towards Intelligent Clinically-Informed Language Analyses of People with Bipolar Disorder and Schizophrenia.” The updated manuscript includes the following ethics changes:

1. The “Ethical Considerations” section has been expanded to include two sections: “Dataset Creation” and “Intended Use.”
  1. The former provides additional details regarding the data release, including characteristics of the released data and the conditions under which it will be released. Since the transcripts will be released through the U.S. National Institute of Mental Health’s Data Archive, the terms and conditions of this release are governed by the NIMH Data Archive Data Use Certification, linked in this expanded section.
  2. The latter provides additional discussion of intended and unintended use of this dataset, including in conditions when the data is used as intended and technology is function correctly, when the data is used as intended but the technology is functioning incorrectly, and when the data is misused.
2. We also describe details pertaining to the data release in a new section (3.4) added to the “Data” section of the paper.
3. A datasheet attachment was suggested during the ethics review; we appreciate this feedback and have created one for our dataset. We attach it as Appendix C. Our datasheet includes details about:
  1. Data collection and creation
  2. Intended audience
  3. Validity of diagnoses
  4. Fair uses
  5. Interpreting the paper
  6. Inappropriate uses
4. We include additional details regarding our informed consent processes in Section 3.2.
5. We detail the methods used to de-identify subjects in our dataset in Section 4.1 (and also in “Dataset Creation” in the “Ethical Considerations” section).
6. We extend our discussion of the limitations of our classification experiments in the “Limitations” section, and also discuss this in “Intended Use” in the “Ethical Considerations” section.

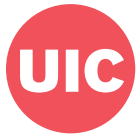

---

We appreciate the anonymous feedback, and we feel that it has improved the value of our paper. We are excited to share this new interdisciplinary resource with others using the mechanisms described our paper, and we look forward to pursuing follow-up studies of our own.

Sincerely,

Ankit Aich B.S.,<sup>1</sup> Avery Quynh B.S.,<sup>2</sup> Varsha Badal Ph.D.,<sup>2</sup> Amy Pinkham Ph.D.,<sup>3</sup> Philip Harvey Ph.D.,<sup>4</sup> Colin Depp Ph.D.,<sup>2</sup> and Natalie Parde Ph.D.<sup>1</sup>

Authors, *Towards Intelligent Clinically-Informed Language Analyses of People with Bipolar Disorder and Schizophrenia*

<sup>1</sup>Department of Computer Science, University of Illinois Chicago

<sup>2</sup>Department of Psychiatry, University of California San Diego

<sup>3</sup>School of Behavioral and Brain Sciences, The University of Texas at Dallas

<sup>4</sup>University of Miami Miller School of Medicine
